# Supplementary material
Source: publisher figshare collection journal article supplement (https://acs.figshare.com/ndownloader/files/4595191)
Supplement: Supplementary file 1 [file 4595191]

## Supporting information

### Further Investigation of the Effect of Framework Catenation on Hydrogen Uptake in Metal-Organic Frameworks

*Shengqian Ma,<sup>†,§</sup> Juergen Eckert<sup>‡</sup>, Paul M. Forster,<sup>§,\*</sup> Ji Woong Yoon,<sup>//</sup> Young Kyu Hwang,<sup>//</sup> Jong-San Chang,<sup>//,\*</sup> Christopher D. Collier,<sup>†</sup> John B. Parise,<sup>#</sup> and Hong-Cai Zhou<sup>†,\*</sup>*

Department of Chemistry, Texas A&M University, PO Box 30012, College Station, TX 77842-3012, USA; Materials Research Laboratory, University of California, Santa Barbara, California 93106 USA; Department Of Chemistry, University of Nevada-Las Vegas, Las Vegas, NV 89154 USA; Catalysis Center for Molecular Engineering, Korea Research Institute of Chemical Technology (KRICT), Jang-dong 100, Yuseong-Gu, Daejeon 305-600, Korea; Mineral Physics Institute, Stony Brook University, Stony Brook, NY 11794, USA.

[zhou@mail.chem.tamu.edu](mailto:zhou@mail.chem.tamu.edu), [Paul.Forster@unlv.edu](mailto:Paul.Forster@unlv.edu), [jschang@kRICT.re.kr](mailto:jschang@kRICT.re.kr)

<sup>§</sup> Current address: Chemical Sciences and Engineering Division, Argonne National Laboratory, 9700 S. Cass Avenue, Argonne, IL 60439, USA

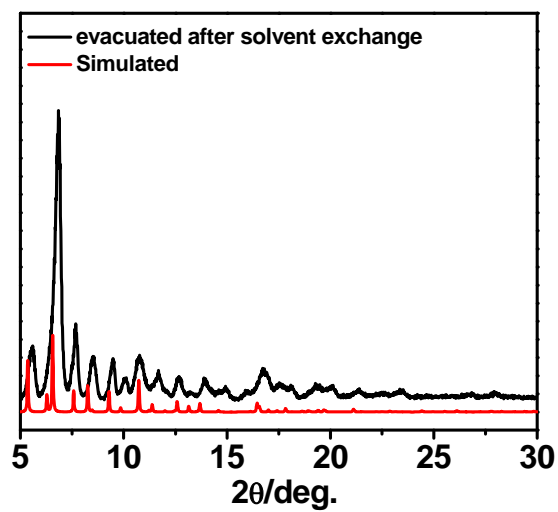

(a)

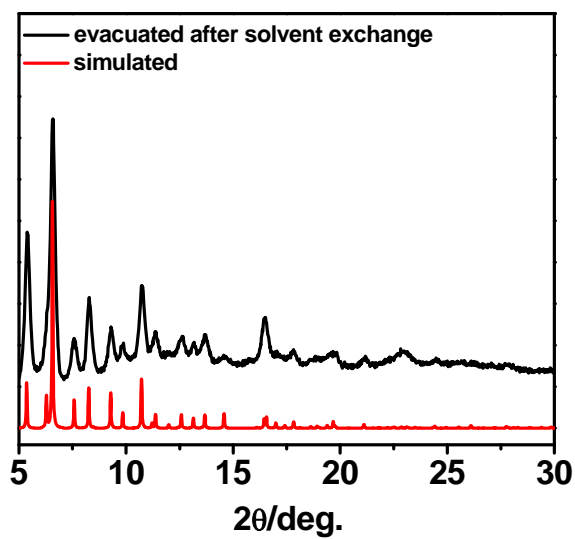

(b)

**Figure S1.** Powder X-ray diffraction patterns: (a) PCN-6; (b) PCN-6'.

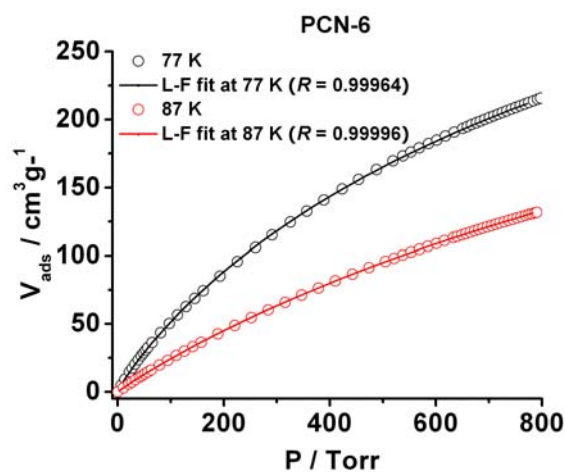

(a)

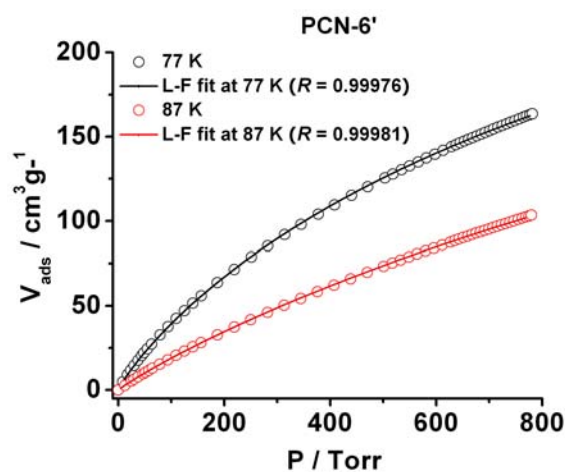

(b)

**Figure S2.** H<sub>2</sub> adsorption isotherms at 77 and 87 K fitted with Langmuir-Freundlich equation. (a) PCN-6; (b) PCN-6'.

**Synthesis of Cu-BTC:** Cu-BTC was prepared under microwave irradiation: an exact amount of H<sub>3</sub>BTC (2.0 mmol) and copper(II) nitrate trihydrate, Cu(NO<sub>3</sub>)<sub>2</sub>·3H<sub>2</sub>O (3.65 mmol) were dissolved in 30 mL of a 1:1 mixture of water: ethanol. The mixture was transferred to a microwave Teflon reactor, stirred magnetically for a minute and was reacted at a temperature of 140 °C for 1 h under 300 W.

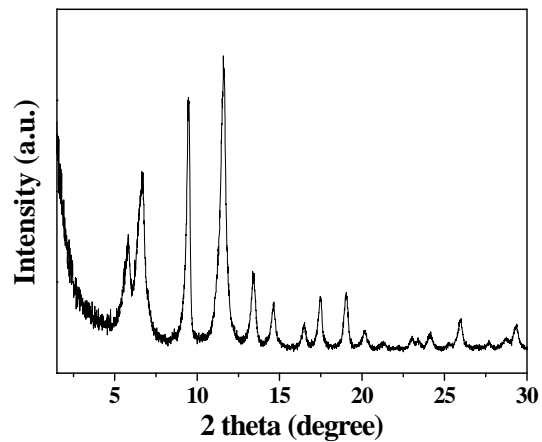

**Figure S3.** Powder X-ray diffraction pattern of Cu-BTC

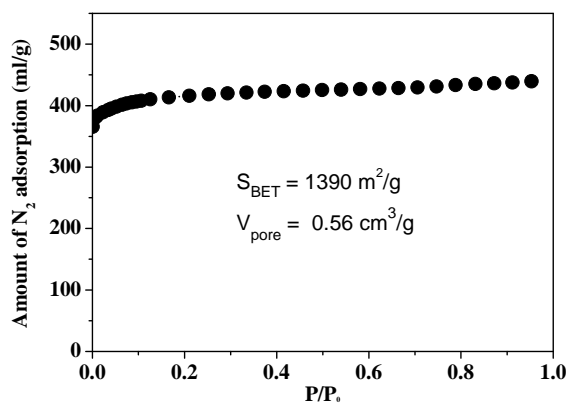

**Figure S4.** N<sub>2</sub> adsorption isotherm of Cu-BTC at 77 K.

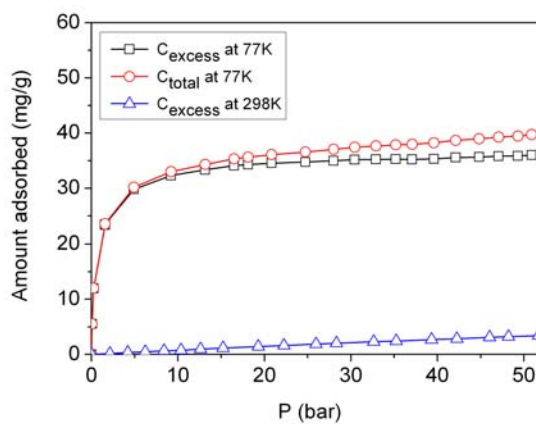

**Figure S5.** High pressure H<sub>2</sub> Sorption Isotherms for Cu-BTC
